# Capelin (*Mallotus villosus*) distribution and climate: a sea “canary” for marine ecosystem change

G. A. Rose

Rose, G. A. 2005. Capelin (*Mallotus villosus*) distribution and climate: a sea “canary” for marine ecosystem change. — ICES Journal of Marine Science, 62: 1524–1530.

Capelin (*Mallotus villosus*) is a classic “r” adapted pelagic species that inhabits the northern boreal oceans at the margins of cold Arctic waters. The species originated in the North Pacific and colonized the North Atlantic at least once during interglacial periods of the past few million years. Capelin became the main forage species for many larger predatory fish, and also for seabirds and marine mammals. The colonizing abilities of capelin have been noted in historical anecdotes, typically in concert with climate variations. In this paper, all known shifts in distribution are catalogued. Shifts have taken place at the larval and adult stages, and some result in new spawning locations, others do not. Displacement distance relates to temperature change:  $\log_{10}(\text{distance}_{\text{km}}) = 0.28 \times \text{temperature change} + 2.16$  ( $p < 0.05$ ,  $r^2 = 0.91$ ). The persistence of the shifts relates to the displacement distance:  $\log_{10}(\text{persistence}_y) = 2.62 \times \log_{10}(\text{distance}_{\text{km}}) - 6.56$  ( $p < 0.05$ ,  $r^2 = 0.83$ ). The quick and consistent response of capelin to temperature change, its importance to the North Atlantic foodweb, and established monitoring methods suggest this species as a sea “canary” for northern boreal marine ecosystem responses to climate variability and change.

© 2005 International Council for the Exploration of the Sea. Published by Elsevier Ltd. All rights reserved.

Keywords: capelin, climate change, northern boreal ecosystems, temperature.

Received 14 June 2004; accepted 15 May 2005.

G. A. Rose: Fisheries Conservation Chair, Fisheries and Marine Institute of Memorial University of Newfoundland, St. John's, NL, Canada, A1C 5R3. Tel: +1 709 7780482; fax: +1 709 7780669; e-mail: [grose@mi.mun.ca](mailto:grose@mi.mun.ca).

## Introduction

The capelin (*Mallotus villosus*) is a small and short-lived osmerid, a pelagic species with high reproductive potential and intrinsic rate of population growth “r” (Vilhjálmsson, 1994). Its distribution is circumpolar in boreal waters of the North Pacific and North Atlantic oceans (Figure 1). Feeding occurs in the margins of very cold Arctic waters. Capelin originated in the North Pacific, where osmerids are endemic (Ekman, 1953). The species migrated to the North Atlantic during interglacial periods within the past few million years, although the exact timing is difficult to specify (Ekman, 1953; Stergiou, 1989). Capelin then migrated eastwards across the Greenland–Iceland–Jan Mayen region and into the Barents Sea. This range expansion in response to climate change led to genetic separation and the development of somewhat different regional life history strategies, in particular related to reproduction (e.g. Vilhjálmsson, 1994; Carscadden and Vilhjálmsson, 2002).

Capelin have two modes of reproductive behaviour, beach and deeper water spawning, which have a curious geographic distribution. Beach spawning dominates in much of the Pacific and Newfoundland regions, but deeper water spawning dominates in Icelandic and Norwegian waters. This distribution led Stergiou (1989) to speculate that a very recent re-incursion of beach-spawning capelin to the Northwest Atlantic from the North Pacific occurred during the melting of late Wisconsin ice between 6000 and 12 000 years ago. However, there is evidence against this notion. During the last glacial maximum (LGM) about 12 000 years ago, the North Atlantic was much colder than it is today, and land masses and adjacent seas were covered in the massive Scandinavian, Greenland, and Laurentide ice sheets. Models of sea surface temperature (SST) during the LGM show declines of up to 5–6°C in open water, and most current spawning areas would have been ice bound (Sarnthein *et al.*, 2003). The sole contemporary Atlantic spawning ground that was ice-free during the LGM is the southeast shoal of the Grand Bank, which was then above sea level

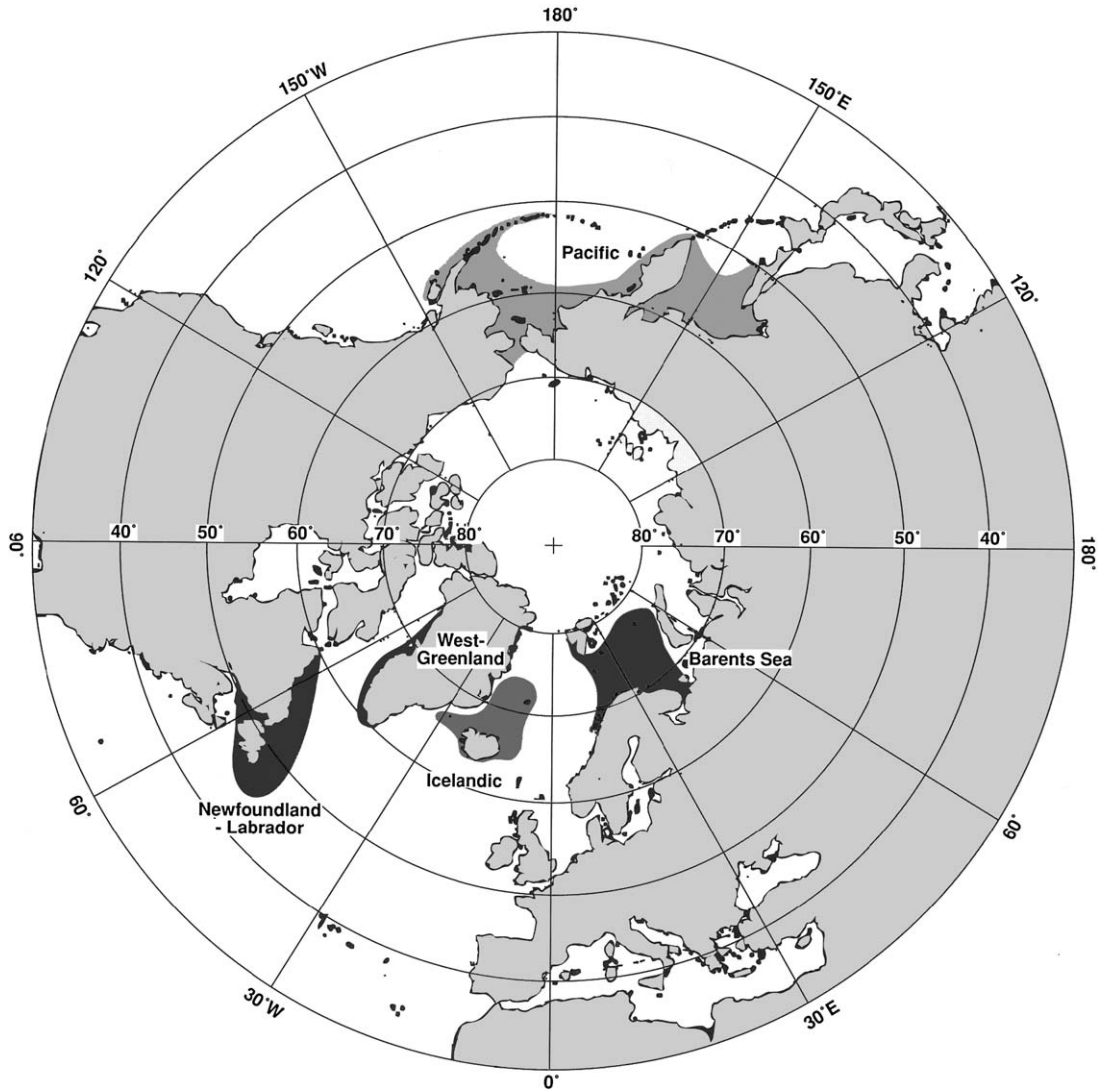

Figure 1. Map of current distribution of capelin (*Mallotus villosus*) and likely migration routes from North Pacific to North Atlantic (redrawn from Vilhjálmsón, 1994).

(Carscadden *et al.*, 1989). During the LGM, capelin distribution in the Northwest Atlantic likely shifted to a southern Grand Bank beach-spawning area (Carscadden *et al.*, 1989). Hence, the original beach-spawning behaviour of capelin in the Atlantic may have survived the ice ages only in Newfoundland waters, and not in the Northeast Atlantic or in Icelandic waters, where contemporary spawning occurs in waters up to 100 m deep (Vilhjálmsón, 1994). Genetic evidence indicates that Pacific and Northwest Atlantic capelin can be distinguished, but beach- and offshore-spawning capelin are indistinguishable in the Newfoundland region, hence adding support for the older migration hypothesis but inconsistent with more recent incursions (Dodson *et al.*, 1991).

The origin of capelin and its spread from the North Pacific to Northwest Atlantic, then to the Northeast Atlantic, illustrate the influence that large-scale climate change has on marine zoogeography. The North Pacific was not as heavily glaciated as was the North Atlantic, and capelin habitat was likely much closer to contemporary conditions than in the North Atlantic (Stergiou, 1989). Since the big shift from the North Pacific, capelin have been observed to shift their distributions several times.

In this paper, I compile data from reported shifts in capelin distribution. These data are used to quantify the relationship between temperature change and distance displaced for capelin during the feeding and spawning

seasons. The objective of this analysis was to provide a quantitative framework for predicting the likely response of capelin to climate change.

## Methods

The literature was searched for descriptions and data on reported capelin locations, environmental data, shifts in distribution, and ancillary information such as temperature changes during the period of the shift and distance moved. In most cases, these data were extracted from tables, maps, or charts documented in the sources cited in Tables 1 and 2. In some cases where there was disagreement among reports, such as occupied temperatures, judgement was used as to what was the more reliable source. In addition, original data from Newfoundland and Labrador were used in the case of temperatures and salinities occupied during the non-spawning period.

## Results

Over their range in the North Pacific and Atlantic oceans, capelin are found in temperatures that range from  $-1.5$  to  $14^{\circ}\text{C}$  (Table 1). They are most often found in waters ranging from  $-1$  to  $6^{\circ}\text{C}$ . During spawning, their thermal range typically shifts upwards and may contract. Beach spawning occurs at  $2$ – $10^{\circ}\text{C}$ , but deepwater spawning is restricted to about  $2$ – $7^{\circ}\text{C}$  (it most likely occurs from  $2$  to  $5^{\circ}\text{C}$ ). As adults, capelin tend to occupy a relatively narrow range of salinities, from 33 to 35 psu. However, spawning has been reported over a wide salinity range from 3 to 35 psu reflecting the differences between beach (fresher) and deepwater (more saline) environments.

Changes in capelin distribution have been reported at both the larval stage, as a consequence of drift, and as

active feeding or spawning range changes of juveniles and adults (Table 2). Changes can be described as shifts, which involve distribution changes within the typical stock range (e.g. Barents Sea shifts), or excursions, which take fish outside their normal range (e.g. Newfoundland Banks–Scotian Shelf excursions of 1990s). Excursions at times have resulted in new spawning areas (North Pacific to North Atlantic excursions), but at times they have not (Faroe Islands excursion). All stocks have exhibited spawning and feeding range displacements associated with climate variations.

The magnitude of capelin distribution changes was associated with sea temperature changes during the same period (Figure 2). The relationship was non-linear and best described by a logarithmic function:  $\log_{10}(\text{distance}_{\text{km}}) = 0.28 \times \text{temperature change} + 2.16$  ( $p < 0.05$ ,  $r^2 = 0.91$ ,  $n = 12$ ). This relationship indicates that small changes in temperature (ca.  $1^{\circ}\text{C}$ ) are associated with changes in distribution over scales of hundreds of kilometres, but larger changes in temperature (several degrees) may result in much larger displacements. There have been no reported cases of widespread extinction of capelin populations, although vast areas have become relatively vacated as a consequence of distribution shifts.

The persistence of documented changes in distribution correlated with the spatial scale of the change (Figure 3). The best fit model was  $\log_{10}(\text{persistence}_y) = 2.62 \times \log_{10}(\text{distance}_{\text{km}}) - 6.56$  ( $p < 0.05$ ,  $r^2 = 0.83$ ,  $n = 13$ ). Changes that persisted for only 1 year (interannual variability) were relatively small, on the order of 100 km, and can be identified as shifts within the normal range. Longer-term changes that result in new spawning locations, such as in the Newfoundland Banks–Flemish Cap–Scotian Shelf–Gulf of St. Lawrence region in the late 1980s and early 1990s, and that result in new

Table 1. Depths, temperatures, and salinities where capelin are found and where they spawn in all stocks. Depth in m, temperature in  $^{\circ}\text{C}$ , start and end in months, salinity in psu. NL means Newfoundland. Note that feeding temperatures have two interpretations. Unbracketed ranges are where capelin can be located; ranges in parentheses are where most are located or concentrated. It was not always possible from the literature to make this interpretation, and in those cases only one range is reported. As an example, capelin are reported to be concentrated in  $<2^{\circ}\text{C}$  Icelandic waters (Vilhjálmsón, 1994), but maps in the same report show capelin extending to  $6^{\circ}\text{C}$ . This is less of a problem with spawning characteristics, which are better specified in the literature.

| Stock       | Feeding   |                                  | Spawning |     |           | References     |             |                                                      |
|-------------|-----------|----------------------------------|----------|-----|-----------|----------------|-------------|------------------------------------------------------|
|             | Depth     | Temperature                      | Start    | End | Depth     |                | Temperature | Salinity                                             |
| NL coastal  | 1 to 450  | $-1.5$ to $6$<br>( $-1$ to $2$ ) | 6        | 7   | 0 to 10   | $3.5$ to $10$  | 14 to 33    | Nakashima and Wheeler, 2002; unpubl. data            |
| Grand Bank  | 1 to 250  | $-1.5$ to $6$<br>( $-1$ to $2$ ) | 6        | 7   | 40 to 50  | 2 to 5         | 34 to 35    | Carscadden <i>et al.</i> , 1989; unpubl. data        |
| Barents Sea | 10 to 250 | ( $-1$ to $2$ )                  | 3        | 4   | 10 to 100 | $1.5$ to $6.5$ | 32 to 34.6  | Loeng <i>et al.</i> , 1983; Gjøsæter and Loeng, 1987 |
| Icelandic   | 10 to 400 | $-1.5$ to $6$<br>( $-1$ to $2$ ) | 3        | 4   | 10 to 150 | 2 to 7         | 35+         | Vilhjálmsón, 1994                                    |
| Greenland   | 1 to 600  | ( $-1$ to $2$ )                  | 4        | 7   | 0 to 10   | $1.9$ to $8.5$ | 15 to 33    | Hansen, 1943; Friis-Rødel and Kannevorf, 2002        |
| Pacific     | 1 to 100  | (0 to 4)                         | 6        | 7   | 0 to 5    | 2 to 14        | 3 to 33     | Stergiou, 1989; Brown, 2002                          |

Table 2. Documented changes in capelin (*Mallotus villosus*) distribution and spawning sites. GOA is Gulf of Alaska; NE NL is northeast Newfoundland and Labrador; GOSL is Gulf of St. Lawrence; BOF is Bay of Fundy. D is distance moved for feeding (if different, spawning distance are in parentheses); P is persistence (note that the recent shifts in the Northwest Atlantic have not yet reverted, so P is underestimated.); T is temperature change.

| Stage  | Spawn | Mechanism                    | Region        | Year        | D (km)    | P (years) | T (°C) | References                                                            |
|--------|-------|------------------------------|---------------|-------------|-----------|-----------|--------|-----------------------------------------------------------------------|
| Larval | No    | Drift                        | Faroes        | 1991        | 780       | 3         |        | Jákupsstovu and Reinert, 2002                                         |
|        | Yes   | Drift                        | GOA           | 1978–1979   | 280       |           |        | Doyle <i>et al.</i> , 2002                                            |
| Adult  | No    | Temperature (currents, food) | Iceland       | 1960–1980   | 445       | 1         | 3      | Vilhjálmsón, 1994                                                     |
|        | Yes   | Temperature                  | Trans-Arctic  | Pleistocene | 12 000    | 50 000    | 6      | Vilhjálmsón, 1994; Sarnthein <i>et al.</i> , 2003                     |
|        | Yes   | Temperature                  | Barents       | 1972–1983   | 509 (225) | 1         | 2      | Ozhigin and Luka, 1984; Gjøsæter and Loeng, 1987                      |
|        | Yes   | Temperature                  | Barents       | 1987–1988   | 280 (100) | 1         | 1      | Gjøsæter, 1998                                                        |
|        | Yes   | Temperature                  | Barents       | 1995–1996   | 200 (100) | 1         | 0.6    | Gjøsæter, 1998                                                        |
|        | Yes   | Temperature (food)           | Scotian Shelf | 1987–       | 550       | 18        | 2.7    | Frank <i>et al.</i> , 1996                                            |
|        | Yes   | Temperature (food)           | NE NL         | 1990–       | 500       | 15        | 1.5    | Lilly, 1994; Shackell <i>et al.</i> , 1994; O’Driscoll and Rose, 2000 |
|        |       | Temperature                  | Flemish Cap   | 1990–       | 445       | 15        | 1.7    | Frank <i>et al.</i> , 1996                                            |
|        | Yes   | Temperature                  | GOSL          | 1990–       | 890       | 15        | 2.7    | Frank <i>et al.</i> , 1996                                            |
|        | Yes   | Temperature                  | BOF           | 1915–1919   | 1 200     | 4         | 2      | Bigelow and Schroeder, 1953; Frank <i>et al.</i> , 1996               |
|        | Yes   | Temperature                  | BOF           | 1965–1968   | 1 200     | 4         | 3.2    | Tibbo and Humphrey, 1966; Frank <i>et al.</i> , 1996                  |
|        | Yes   | Temperature                  | Trans-Arctic  | 4000 BC     | 6 000     | 6 000     | 6      | Vilhjálmsón, 1994; Sarnthein <i>et al.</i> , 2003                     |

spawning sites, typically persist longer. The longest-term changes during the Pleistocene that have persisted for tens of thousands of years were large, up to approximately 10 000 km.

### Discussion

Capelin range shifts have occurred at both the larval and adult stages. In 1991, the Faroe Islands region experienced an influx of capelin larvae, perhaps from spawning near Iceland. There is no Faroe Islands capelin spawning population, and the 1991 influx did not result in spawning at the Faroes (Jákupsstovu and Reinert, 2002). Distribution change can also occur through changes in feeding areas and migrations. Some of these changes result in changes in spawning locations, and some do not. The largest change in capelin distribution occurred with migrations from the North Pacific to the Northwest Atlantic. This movement resulted in changes in both feeding and spawning areas. At shorter time scales, changes in both feeding and spawning areas have been documented at annual scales in the Barents Sea (Loeng *et al.*, 1983; Ozhigin and Luka, 1984; also see references in Russian cited in Gjøsæter, 1998). Even larger-scale changes have occurred in the Grand Bank region,

although the life stage of the migrants (larval or adult) is not entirely clear (Frank *et al.*, 1996). Similar changes in capelin distribution to the Flemish Cap are unlikely to result in spawning there, but shifts to the southern Gulf of

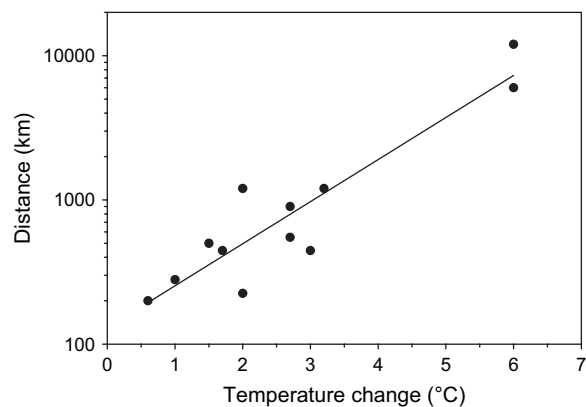

Figure 2. Relationship between displacement of capelin (*Mallotus villosus*) and temperature change. The best fit model was  $\log_{10}(\text{distance}_{\text{km}}) = 0.28 \times \text{temperature change} + 2.16$  ( $p < 0.05$ ,  $r^2 = 0.91$ ,  $n = 12$ ). The two longest distance points might be replaced by a single value, depending on whether one or two incursions occurred, but it will influence the model little.



oversimplified), the present analyses would suggest maximal shifts of approximately 400–1800 km (4–18° latitude). However, this prediction depends entirely on the coordinates of the shift in the Arctic Polar Fronts, which in general will not move uniformly with respect to latitude, so these estimates describe maximal expected shifts. It is feasible that local cooling of the Northwest Atlantic may accompany overall global warming. Under this scenario, capelin might remain in their present southern distribution with concentrations in the Gulf of St. Lawrence and on the Scotian Shelf. Another global climate scenario predicts more widespread cooling as a result of the weakening of the Gulf Stream and the North Atlantic heat pump (Hansen *et al.*, 2001; Dickson *et al.*, 2002; Hakkinen and Rhines, 2004). Under this scenario, southerly movements of capelin, such as observed in the Northwest Atlantic in the 1990s, might be expected to become more widespread. It is evident that differing climate scenarios have different outcomes for capelin, precisely because it is a quick responder.

Other factors not dealt with directly in this study, but related to capelin distribution and basic biological metrics, are also likely to be influenced quickly by the ocean environment. These include range extensions during the feeding season (Gjøsæter, 1998), changes in vertical distribution (Mowbray, 2002), and spawning timing and somatic growth (Carscadden *et al.*, 2002). Such features enhance the potential of capelin as a sea “canary” to monitor climate change in northern boreal ecosystems. In marine ecosystems that contain more species and are likely more complex, such single-species indicators may not be present, but communities or assemblages of species might be considered necessary to monitor change.

Changes in distribution of an important, perhaps keystone, species such as capelin may be expected to have a direct impact on the many species that feed on them. Nearly 100 years ago, it was reported by Hjort (1914) that fluctuations in capelin in the Barents Sea led to changes in cod distribution and growth. This early recognition has been verified by more complete analyses of nearly a century of data (Gjøsæter, 1998, and references therein). Off Iceland, the mean weight of cod has been shown to be a direct function of capelin biomass (Astthorsson and Vilhjálmsón, 2002; Vilhjálmsón, 2002). In Labrador and Newfoundland waters, the decline and southerly shift of capelin in the 1990s have led to a major dietary change in cod, declines in seasonal condition, and perhaps even mortality (Rose and O’Driscoll, 2002). In addition to influencing cod, changes in capelin are likely to influence other species of predatory fish, such as salmon (Reddin and Friedland, 1993), Arctic char (Dempson *et al.*, 2002), and Greenland halibut, and some seabirds (Carscadden *et al.*, 2002) and marine mammals. These direct effects are likely to cascade through the ecosystem. Although the extent of these changes is beyond our predictive abilities, there is little doubt that they can occur (Dalpadado *et al.*, 2002), and will be impacted by climate change.

As a final comment, because capelin are a “canary” for climate change, a harbinger for changes in boreal-Arctic foodwebs and fisheries of northern oceans, it is suggested that capelin be monitored through concerted international scientific effort by northern hemisphere states. Acoustic monitoring techniques developed over several decades (Vilhjálmsón, 1994; Gjøsæter, 1998) would provide an efficient means of doing this.

## Acknowledgements

This work was supported by the NSERC Chair in Fisheries Conservation at Memorial University and NSERC grants held by the author. S. Fudge helped collate the data. I thank Hjalmar Vilhjálmsón for permission to use his figure on capelin distribution, Harald Gjøsæter for pointing to examples of Barents Sea capelin spawning shifts first reported in earlier Russian literature, and Nick Bailey for valuable insights on earlier presentations of the data. Another reviewer suggested that the “canary” analogy was imperfect because the canary had to die to be noticed. The reviewer was correct, but I hope it does not come to this. When the singing changes — a signal has been sent.

## References

- Astthorsson, O. S., and Vilhjálmsón, H. 2002. Iceland shelf LME: decadal assessment and resource sustainability. *In* Large Marine Ecosystems of the North Atlantic, pp. 219–243. Ed. by K. Sherman, and H. R. Skjoldal. Elsevier, Amsterdam.
- Bigelow, H. B., and Schroeder, W. C. 1953. Fishes of the Gulf of Maine. U.S. Fish Wildlife Service Bulletin No. 53 (Fisheries Bulletin No. 74).
- Brown, E. D. 2002. Life history, distribution, and size structure of Pacific capelin in Prince William Sound and the northern Gulf of Alaska. *ICES Journal of Marine Science*, 59: 983–996.
- Carscadden, J. E., Frank, K. T., and Miller, D. S. 1989. Capelin (*Mallotus villosus*) spawning of the southeast shoal: influence of physical factors past and present. *Canadian Journal of Fisheries and Aquatic Sciences*, 46: 1743–1754.
- Carscadden, J. E., Montevecchi, W. A., Davoren, G. K., and Nakashima, B. S. 2002. Trophic relationships among capelin (*Mallotus villosus*) and seabirds in a changing ecosystem. *ICES Journal of Marine Science*, 59: 1027–1033.
- Carscadden, J. E., and Vilhjálmsón, H. 2002. Capelin — what are they good for? Introduction. *ICES Journal of Marine Science*, 59: 863–869.
- Dalpadado, P., Bogstad, B., Gjøsæter, H., Mehl, S., and Skjoldal, H. R. 2002. Zooplankton—fish interactions in the Barents Sea. *In* Large Marine Ecosystems of the North Atlantic, pp. 269–291. Ed. by K. Sherman, and H. R. Skjoldal. Elsevier, Amsterdam.
- Dempson, J., Shears, M., and Bloom, M. 2002. Spatial and temporal variability in the diet of anadromous Arctic char, *Salvelinus alpinus*, in northern Labrador. *Environmental Biology of Fishes*, 64: 49–62.
- Dickson, B., Yashayaev, I., Meincke, J., Turrell, B., Dye, S., and Hoffort, J. 2002. Rapid freshening of the deep North Atlantic Ocean over the past four decades. *Nature*, 416: 832–837.
- Dodson, J. J., Carscadden, J. E., Bernatchez, L., and Colombani, F. 1991. Relationship between spawning mode and phylogeographic structure in mitochondrial DNA of north Atlantic capelin

- Mallotus villosus*. Marine Ecology Progress Series, 76: 103–113.
- Doyle, M. J., Busby, M. S., Duffy-Anerson, J. T., Picquelle, S. J., and Matarese, A. C. 2002. Early life history of capelin (*Mallotus villosus*) in the northwest Gulf of Alaska: a historical perspective based on larval collections, October 1977–March 1979. ICES Journal of Marine Science, 59: 997–1005.
- Ekman, S. 1953. Zoogeography of the Sea. Sidgwick and Jackson, London. 417 pp.
- Frank, K. T., Carscadden, J. E., and Simon, J. E. 1996. Recent excursions of capelin (*Mallotus villosus*) to the Scotian Shelf and Flemish Cap during anomalous hydrographic conditions. Canadian Journal of Fisheries and Aquatic Sciences, 53: 1473–1486.
- Friis-Rodel, E., and Kannevorff, P. 2002. A review of capelin (*Mallotus villosus*) in Greenland waters. ICES Journal of Marine Science, 59: 890–896.
- Gjøsaeter, H. 1998. The population biology and exploitation of capelin (*Mallotus villosus*) in the Barents Sea. Sarsia, 83: 453–496.
- Gjøsaeter, H., and Loeng, H. 1987. Growth of the Barents Sea capelin, *Mallotus villosus*, in relation to climate. Environmental Biology of Fishes, 20(4): 293–300.
- Hakkinen, S., and Rhines, P. B. 2004. Decline of subpolar north Atlantic circulation during the 1990s. Science, 304: 555–559.
- Hansen, B., Turrell, W., and Osterhus, S. 2001. Decreasing overflow from the Nordic Seas into the Atlantic Ocean through the Faroe Bank channel since 1950. Nature, 411: 927–930.
- Hansen, P. M. 1943. Capelin (*Mallotus villosus*), Greenland. Annals of Biology, 1: 121–124.
- Hjort, J. 1914. Fluctuations in the great fisheries of northern Europe. Rapports et Procès-Verbaux de Réunions du Conseil International pour l'Exploration de la Mer. 227 pp.
- Jákupsstovu, S. H., and Reinert, J. 2002. Capelin in Faroese waters – a messenger of harsh times? ICES Journal of Marine Science, 59: 884–889.
- Lilly, G. R. 1994. Predation by Atlantic cod on capelin on the southern Labrador and Northeast Newfoundland shelves during a period of changing spatial distributions. ICES Marine Science Symposia, 198: 600–611.
- Loeng, H., Nakken, O., and Raknes, A. 1983. The distribution of capelin in the Barents Sea in relation to water temperature in the period 1974–1982. Fisken og Havet, 1983: 1–17 (In Norwegian)
- Mowbray, F. 2002. Changes in vertical distribution of capelin (*Mallotus villosus*) off Newfoundland. ICES Journal of Marine Science, 59: 942–949.
- Nakashima, B. S., and Wheeler, J. P. 2002. Capelin (*Mallotus villosus*) spawning behaviour in Newfoundland waters – the interaction between beach and demersal spawning. ICES Journal of Marine Science, 59: 909–916.
- O'Driscoll, R., and Rose, G. A. 2000. Spatial dynamics of cod–capelin associations off Newfoundland. In Spatial Processes and Management of Fish Populations, Lowell Wakefield Symposium Series, pp. 479–498. University of Alaska Sea Grant College Program, Fairbanks, Alaska.
- Ozhigin, V. K., and Luka, G. I. 1984. Some peculiarities of capelin migrations depending on thermal conditions in the Barents Sea. In The Proceedings of the Soviet-Norwegian Symposium on the Barents Sea Capelin, pp. 135–148. Ed. by H. Gjøsaeter. Institute of Marine Research, Bergen, Norway.
- Reddin, D. G., and Friedland, K. D. 1993. Marine environmental factors influencing the movement and survival of Atlantic salmon. In Salmon in the Sea and New Enhancement Strategies, pp. 79–103. Ed. by D. Mills. Fishing News Books, Blackwell, Oxford, UK.
- Rose, G. A., and O'Driscoll, R. L. 2002. Capelin are good for cod: can the northern stock rebuild without them? ICES Journal of Marine Science, 59: 1018–1026.
- Sarnthein, M., Pflaumann, U., and Weinelt, M. 2003. Past extent of sea ice in the northern North Atlantic inferred from foraminiferal paleotemperature estimates. Paleoceanography, 18(2): 25-1–25-8.
- Shackell, N. L., Carscadden, J. E., and Miller, D. S. 1994. Migration of pre-spawning capelin (*Mallotus villosus*) as related to temperature on the northern Grand Bank, Newfoundland. ICES Journal of Marine Science, 51: 107–114.
- Stergiou, K. I. 1989. Capelin *Mallotus villosus* (Pisces: Osmeridae), glaciations, and speciation: a nomothetic approach to fisheries ecology and reproductive biology. Marine Ecology Progress Series, 56: 211–224.
- Templeman, W. 1948. The life history of capelin (*Mallotus villosus*) in Newfoundland waters. Bulletin Newfoundland Government Laboratory Publication No. 17: 1–151.
- Tibbo, S. N., and Humphrey, R. D. 1966. An occurrence of capelin (*Mallotus villosus*) in the Bay of Fundy. Journal of the Fisheries Research Board of Canada, 23: 463–467.
- Vilhjálmsón, H. 1994. The Icelandic capelin stock. Journal of the Marine Research Institute Reykjavik, XIII(1). 281 pp.
- Vilhjálmsón, H. 2002. Capelin (*Mallotus villosus*) in the Iceland–East Greenland–Jan Mayen ecosystem. ICES Journal of Marine Science, 59: 870–883.
